# Supplementary material for: Anatomical Quantitative Volumetric Evaluation of Liver Segments in Hepatocellular Carcinoma Patients Treated with Selective Internal Radiation Therapy: Key Parameters Influencing Untreated Liver Hypertrophy
Source: MDPI journal article supplement (doi:10.3390/cancers16030586), 2024-01-30
Supplement: s1 [file s1]

# Supplementary Materials: Anatomical Quantitative Volumetric Evaluation of Liver Segments in Hepatocellular Carcinoma Patients Treated with Selective Internal Radiation Therapy: Key Parameters Influencing Untreated Liver Hypertrophy

Raphaël Girardet, Jean-François Knebel, Clarisse Dromain, Naik Viotti Violi, Georgia Tsoumakidou, Nicolas Villard, Alban Denys, Nermin Halkic, Nicolas Demartines, Kosuke Kobayashi, Antonia Digkila, Niklaus Schaefer, John O. Prior, Sarah Boughdad and Rafael Duran

## Text S1: Treatment

A simulation angiography allowed embolization of any potential non-target extrahepatic vessels, followed by selective injection of technetium-99m-macroaggregated albumin (99mTc-MAA) into the tumor feeding arteries (depending on tumor location) and treatment planning. Imaging with single emission computed tomography with integrated CT (SPECT/CT) allowed quantification of treatment volume, dosimetry planning and lung shunt fraction. Predictive therapy planning based on partition model defined several compartments: whole liver volume, perfused volume, tumor perfused volume and non-tumoral perfused volume. Perfused volume was defined for each injection position. Healthy non-perfused liver volume was obtained after the global perfused volume was subtracted to the whole liver. To achieve personalized dosimetry, we calculated the required 90Y-microspheres activity to obtain the desired mean absorbed dose (Gy) in each perfused volume. SIRT (TheraSphere; Boston Scientific and SIR-Spheres; Sirtex), was performed 2–4 weeks following the simulation angiography.

## Text S2: MRI Acquisition

All MRIs were conducted on 1.5T and 3T devices (Siemens Healthcare GmbH, Erlangen, Germany). Examinations were performed with a surface body array coil. Liver MRI protocol included: a breath-hold axial and coronal T2WI half-Fourier acquisition single-shot turbo spin-echo (T2WI HASTE), a respiration-triggered fat-suppressed turbo spin-echo T2WI, a free breathing fat-suppressed single-shot echoplanar DWI with tridirectional diffusion gradients using b-factors of 50, 400, 800s/mm<sup>2</sup> and a breath-hold axial dynamic T1WI using a fat-suppressed three-dimensional spoiled gradient-echo sequence, volumetric interpolated obtained before contrast material injection. An intravenous injection of 0.1 mmol/kg (0.2 ml/kg) of gadoterate meglumine (Dotarem; Guerbet, Villepinte, France), at a rate of 3ml/second was then performed. Triple arterial phase images were acquired after a delay of 20 seconds with a Caipirinha (controlled aliasing in parallel imaging results in higher acceleration) Dixon TWIST (time-resolved angiography with stochastic trajectories) VIBE volume interpolated breath-hold examination sequence. Portal and late phase followed, at 70 seconds and 3 minutes respectively.

## Text S3: Tumor and Spleen Volume

Baseline tumor volume was similar between glass-microspheres vs resin-microspheres treated patients (mean, 93.7 mL vs 140.2 mL,  $p=0.19$ ). Tumor volume correlated with absolute and relative spleen volumes at 6-months post-SIRT ( $\rho=0.352$ ,  $p=0.018$ ;  $\rho=0.307$ ;  $p=0.043$ ). However, absolute tumor volume increase at 6-months positively correlated with spleen volume increase at 3- and 6-months ( $\rho=0.325$ ;  $p=0.032$ ;  $\rho=0.289$ ,  $p=0.060$  (trend), respectively).

Baseline spleen volume inversely correlated with baseline platelet count ( $\rho=-0.658$ ,  $p<0.001$ ), albumin ( $\rho=-0.312$ ,  $p=0.005$ ) and PT ( $\rho=-0.424$ ,  $p<0.001$ ). It correlated with

baseline total bilirubin ( $\rho=0.365$ ,  $p<0.001$ ) and Child-Pugh score ( $\rho=0.385$ ,  $p<0.001$ ), but not with ASAT, ALAT, ALP, or GGT. No correlation was found between spleen volume evolution and platelet variation over time post-SIRT.

Administered non-tumoral liver activity correlated with spleen volume increase at 3- and 6-months ( $\rho=0.269$ ,  $p=0.029$  and  $\rho=0.398$ ,  $p=0.016$ ), but not at 12-months. Administered  $^{90}\text{Y}$ -activity also impacted spleen volume increase at 3-months ( $\rho=0.221$ ,  $p=0.049$ ). Whereas late decrease in spleen volume at 12-months was observed with high delivered tumor activity ( $\rho=-0.771$ ,  $p<0.001$ ). No relationship was found with the other dosimetric parameters.

**Table S1.** 3D quantitative image analysis of treated liver segments evolution.

| Liver Segments | Absolute median volume [mL] (range) |               |               |                | p-value       |               |                |        |         |
|----------------|-------------------------------------|---------------|---------------|----------------|---------------|---------------|----------------|--------|---------|
|                | Baseline (n = 88)                   | 3 mo (n = 88) | 6 mo (n = 47) | 12 mo (n = 23) | Baseline—3 mo | Baseline—6 mo | Baseline—12 mo | 3–6 mo | 6–12 mo |
| I              | 73 (28-169)                         | 61 (20-195)   | 71 (13-118)   | 78 (30-109)    | 0.485         | 0.11          | 0.25           | 0.455  | 0.625   |
| II             | 224 (85-402)                        | 189 (57-413)  | 225 (79-468)  | 143 (100-227)  | 0.068         | 0.791         | 0.188          | 0.233  | 0.625   |
| III            | 195 (59-1000)                       | 150 (18-787)  | 151 (86-719)  | 106 (68-125)   | 0.061         | 0.092         | 0.062          | 0.11   | 0.062   |
| IV             | 210 (59-528)                        | 177 (38-425)  | 172 (69-320)  | 150 (47-214)   | 0.112         | 0.002         | 0.125          | 0.002  | 0.188   |
| V              | 133 (27-342)                        | 113 (17-232)  | 85 (34-258)   | 66 (27-143)    | <0.001        | <0.001        | <0.001         | <0.001 | <0.001  |
| VI             | 174 (66-417)                        | 144 (23-419)  | 124 (64-384)  | 85 (17-316)    | <0.001        | <0.001        | 0.005          | 0.001  | <0.001  |
| VII            | 257 (59-455)                        | 185 (63-479)  | 191 (92-522)  | 124 (48-273)   | 0.001         | 0.001         | <0.001         | 0.028  | 0.024   |
| VIII           | 207 (63-399)                        | 162 (67-396)  | 158 (44-523)  | 113 (50-310)   | 0.001         | 0.001         | <0.001         | 0.042  | 0.025   |
| Liver Segments | Relative mean volume [%] (SD)       |               |               |                | p-value       |               |                |        |         |
|                | Baseline (n = 88)                   | 3 mo (n = 88) | 6 mo (n = 47) | 12 mo (n = 23) | Baseline—3 mo | Baseline—6 mo | Baseline—12 mo | 3–6 mo | 6–12 mo |
| I              | 5 (1)                               | 5 (2)         | 4 (2)         | 5 (2)          | 0.869         | 0.455         | 1              | 0.542  | 1       |
| II             | 13 (5)                              | 12 (5)        | 12 (5)        | 9 (3)          | 0.269         | 0.85          | 0.125          | 0.97   | 0.438   |
| III            | 13 (7)                              | 11 (7)        | 11 (7)        | 6 (2)          | 0.093         | 0.204         | 0.125          | 0.424  | 0.062   |
| IV             | 14 (5)                              | 13 (6)        | 11 (3)        | 9 (4)          | 0.21          | 0.042         | 0.188          | 0.021  | 0.438   |
| V              | 9 (3)                               | 8 (3)         | 7 (3)         | 5 (3)          | <0.001        | <0.001        | <0.001         | 0.001  | <0.001  |
| VI             | 13 (5)                              | 11 (5)        | 10 (5)        | 8 (6)          | 0.002         | <0.001        | 0.007          | 0.004  | 0.127   |
| VII            | 16 (4)                              | 14 (5)        | 13 (5)        | 10 (5)         | 0.002         | 0.005         | 0.002          | 0.159  | 0.175   |
| VIII           | 12 (3)                              | 11 (4)        | 10 (2)        | 9 (4)          | 0.002         | 0.002         | 0.004          | 0.191  | 0.068   |

**Table S2.** D quantitative image analysis of *untreated* liver segments evolution.

| Liver Segments | Absolute median volume [mL] (range) |               |               |                | p-value       |               |                |        |         |
|----------------|-------------------------------------|---------------|---------------|----------------|---------------|---------------|----------------|--------|---------|
|                | Baseline (n = 88)                   | 3 mo (n = 88) | 6 mo (n = 47) | 12 mo (n = 23) | Baseline—3 mo | Baseline—6 mo | Baseline—12 mo | 3–6 mo | 6–12 mo |
| I              | 80 (9-247)                          | 86 (19-290)   | 107 (17-328)  | 60 (22-198)    | <0.001        | 0.011         | 0.117          | 0.694  | 0.865   |
| II             | 221 (57-527)                        | 240 (34-520)  | 260 (102-521) | 257 (91-501)   | 0.132         | 0.09          | 0.027          | 0.004  | 0.712   |
| III            | 206 (21-556)                        | 224 (42-564)  | 260 (60-674)  | 257 (42-572)   | 0.001         | 0.007         | 0.002          | 0.022  | 0.89    |
| IV             | 231 (98-587)                        | 247 (88-599)  | 253 (68-574)  | 221 (73-2208)  | 0.098         | 0.225         | 0.393          | 0.948  | 0.678   |
| V              | 171 (40-290)                        | 184 (66-345)  | 168 (68-352)  | 125 (112-252)  | 0.019         | 0.453         | 0.866          | 0.325  | 0.641   |
| VI             | 252 (27-421)                        | 253 (53-493)  | 230 (72-465)  | 179 (30-350)   | 0.126         | 0.097         | 0.82           | 0.927  | 0.359   |
| VII            | 292 (129-560)                       | 298 (120-643) | 292 (188-620) | 278 (171-502)  | 0.482         | 0.089         | 0.765          | 0.585  | 0.147   |
| VIII           | 207 (116-485)                       | 208 (19-478)  | 215 (117-511) | 201 (161-307)  | 0.158         | 0.489         | 0.039          | 0.33   | 0.547   |
| Liver Segments | Relative mean volume [%] (SD)       |               |               |                | p-value       |               |                |        |         |
|                | Baseline (n = 88)                   | 3 mo (n = 88) | 6 mo (n = 47) | 12 mo (n = 23) | Baseline—3 mo | Baseline—6 mo | Baseline—12 mo | 3–6 mo | 6–12 mo |
| I              | 5 (2)                               | 6 (3)         | 6 (3)         | 5 (3)          | 0.001         | 0.007         | 0.145          | 0.533  | 0.734   |

|      |        |        |        |         |        |        |        |        |       |
|------|--------|--------|--------|---------|--------|--------|--------|--------|-------|
| II   | 14 (5) | 16 (5) | 16 (6) | 18 (8)  | 0.033  | 0.005  | 0.005  | <0.001 | 0.071 |
| III  | 14 (6) | 16 (7) | 17 (7) | 20 (9)  | <0.001 | <0.001 | <0.001 | 0.003  | 0.243 |
| IV   | 15 (4) | 16 (5) | 16 (6) | 19 (14) | 0.029  | 0.017  | 0.002  | 0.043  | 0.089 |
| V    | 10 (4) | 11 (3) | 10 (4) | 11 (4)  | 0.017  | 0.523  | 0.844  | 0.832  | 0.312 |
| VI   | 14 (5) | 15 (5) | 14 (5) | 13 (5)  | 0.049  | 0.123  | 0.57   | 0.648  | 0.301 |
| VII  | 19 (5) | 21 (6) | 20 (5) | 22 (3)  | 0.06   | 0.137  | 0.042  | 0.272  | 0.831 |
| VIII | 14 (3) | 14 (4) | 14 (3) | 15 (2)  | 0.256  | 0.277  | 0.109  | 0.72   | 0.078 |

**Table S3.** Evolution of relative volumes.

| SIRT                                       | Volume region | Relative volume [%] - mean (SD) |          |          |           | <i>p</i> -value |               |                |        |         |
|--------------------------------------------|---------------|---------------------------------|----------|----------|-----------|-----------------|---------------|----------------|--------|---------|
|                                            |               | Baseline                        | 3-months | 6-months | 12-months | Baseline—3 mo   | Baseline—6 mo | Baseline—12 mo | 3–6 mo | 6–12 mo |
| All ( <i>n</i> = 88)                       | Treated       | 45 (29)                         | 40 (29)  | 35 (27)  | 26 (20)   | <0.001          | <0.001        | <0.001         | <0.001 | <0.001  |
|                                            | Untreated     | 63 (21)                         | 68 (20)  | 71 (19)  | 78 (12)   | <0.001          | <0.001        | <0.001         | 0.095  | 0.401   |
|                                            | Spleen        | -                               | -        | -        | -         | -               | -             | -              | -      | -       |
|                                            | Tumor         | 10 (18)                         | 11 (24)  | 5 (13)   | 2 (2)     | 0.552           | 0.176         | 0.006          | 0.206  | 0.031   |
| Whole liver ( <i>n</i> = 11)               | Treated       | 100 (0)                         | 100 (0)  | 100 (0)  | 100 (0)   | -               | -             | -              | -      | -       |
|                                            | Spleen        | -                               | -        | -        | -         | -               | -             | -              | -      | -       |
|                                            | Tumor         | 25 (33)                         | 19 (24)  | 2 (2)    | 1 (0)     | 0.185           | 0.089         | -              | 0.848  | -       |
| Right/left liver and lobe ( <i>n</i> = 49) | Treated       | 47 (16)                         | 41 (17)  | 37 (15)  | 28 (11)   | <0.001          | <0.001        | <0.001         | <0.001 | <0.001  |
|                                            | Untreated     | 53 (16)                         | 59 (17)  | 63 (15)  | 72 (11)   | <0.001          | <0.001        | <0.001         | 0.005  | 0.038   |
|                                            | Spleen        | -                               | -        | -        | -         | -               | -             | -              | -      | -       |
|                                            | Tumor         | 9 (17)                          | 13 (30)  | 6 (16)   | 1 (1)     | 0.304           | 0.102         | 0.015          | 0.004  | 0.247   |
| Others* ( <i>n</i> = 28)                   | Treated       | 20 (19)                         | 17 (16)  | 18 (20)  | 14 (9)    | <0.001          | 0.025         | 0.178          | 0.847  | 0.213   |
|                                            | Untreated     | 80 (19)                         | 83 (16)  | 82 (20)  | 86 (9)    | <0.001          | 0.025         | 0.178          | 0.865  | 0.653   |
|                                            | Spleen        | -                               | -        | -        | -         | -               | -             | -              | -      | -       |
|                                            | Tumor         | 4 (4)                           | 4 (4)    | 5 (7)    | 2 (3)     | 0.808           | 0.71          | 0.017          | 0.599  | 0.06    |

Note.– \*Others correspond to sectorial (V–VIII or VI–VII), segmental or subsegmental treatments.

**Table S4.** Dosimetric parameters of glass- vs. resin-microspheres

| Dosimetric parameter                        | Glass-microspheres |           | Resin-microspheres |           | t-test  |                 |
|---------------------------------------------|--------------------|-----------|--------------------|-----------|---------|-----------------|
|                                             | Median             | Range     | Median             | Range     | T-value | <i>p</i> -value |
| Administered <sup>90</sup> Y activity (GBq) | 1.6                | 0.25-3.5  | 1.1                | 0.6-2.5   | 1.98    | 0.048           |
| Non-tumoral liver activity (GBq)            | 0.98               | 0.17-3    | 0.7                | 0.07-1.35 | 2.07    | 0.038           |
| Non-tumoral liver dose (Gy)                 | 62.2               | 7.7-801   | 39.8               | 14.8-83.5 | 3.58    | <0.001          |
| Tumor activity (GBq)                        | 0.87               | 0.03-3    | 0.41               | 0.06-1.56 | 2.9     | 0.004           |
| Tumor dose (Gy)                             | 274.5              | 11.1-1267 | 184.9              | 95.5-903  | 2.04    | 0.042           |

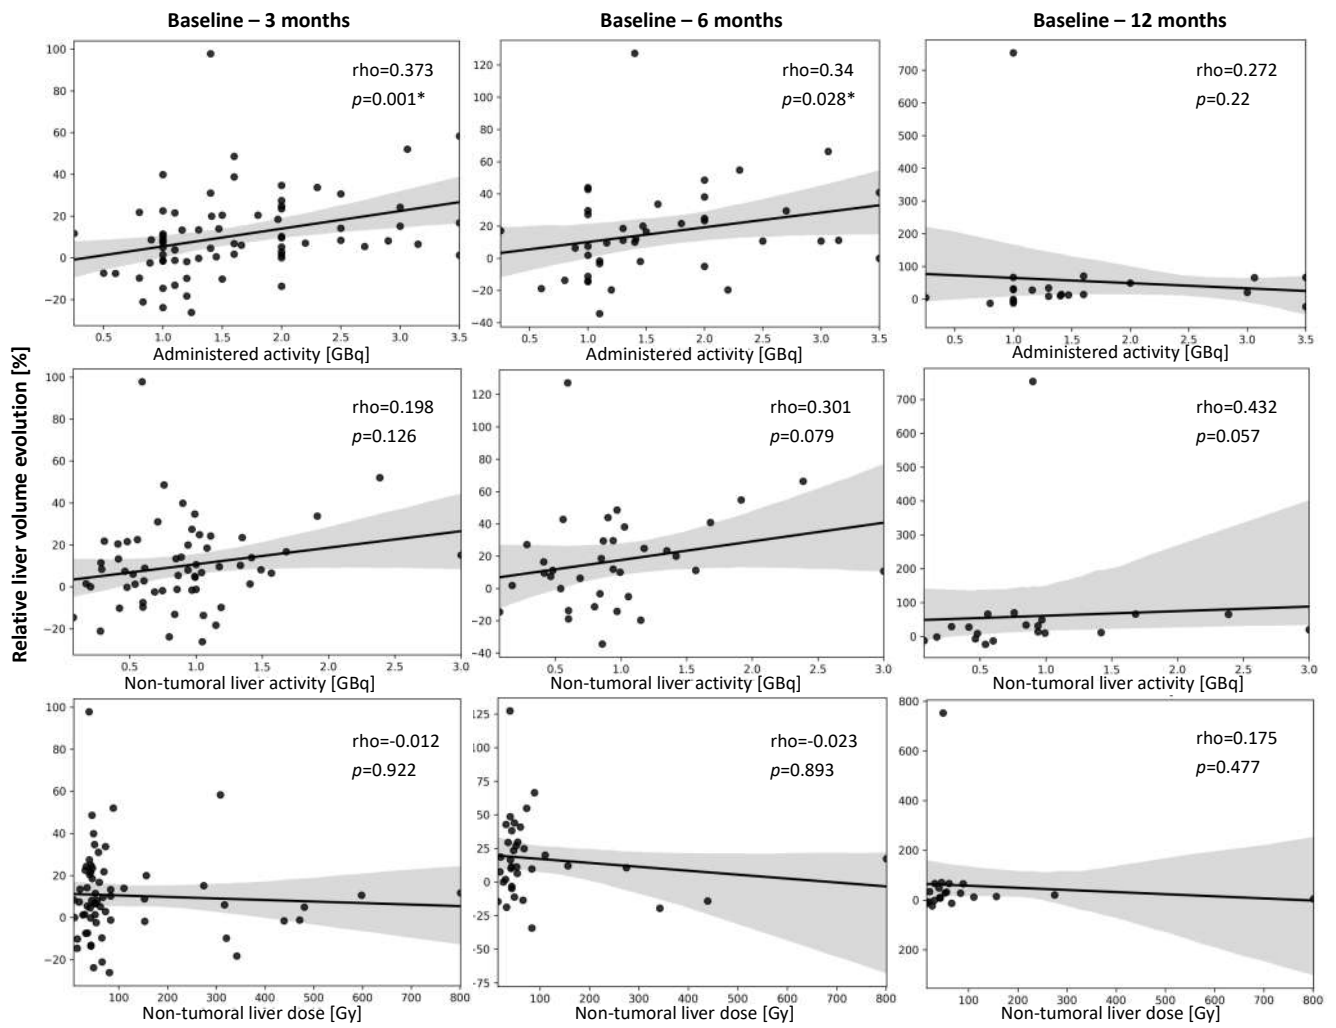

**Figure S1.** Linear regression analysis at 3-, 6- and 12-months of untreated liver volume evolution according to administered activity, non-tumoral liver activity and dose. \*  $p < 0.05$ .
